# Supplementary material
Source: bioRxiv or medRxiv preprint supplement (https://medrxiv.org/content/medrxiv/early/2024/12/05/2024.12.03.24318440/DC1/embed/media-1.pdf)
Supplement: Supplementary file [file media-1.pdf]

Supplementary Table 1. Patient scenarios used in the study

| Scenario No. | Mobility issues              | Cognitive ability and personality (Does not call nurses)                      | Urinary issues      | Presence of tubes or drains           | Medication use    | Age                    |
|--------------|------------------------------|-------------------------------------------------------------------------------|---------------------|---------------------------------------|-------------------|------------------------|
| 1            | Need assistance in transfer  | No cognitive impairment, but reserved and does not call nurses when necessary | Nocturia            | No tube or drain inserted             | Sleeping pill     | Less than 65 years old |
| 2            | Independent                  | No cognitive impairment and calls nurses when necessary                       | Nocturia            | One tube or drain inserted            | Sleeping pill     | 80 years old and over  |
| 3            | Walks alone but unstable     | No cognitive impairment, but reserved and does not call nurses when necessary | Nocturia            | One tube or drain inserted            | Anti-hypertensive | 65-79 years old        |
| 4            | Walks alone but unstable     | Impaired cognition and does not call nurses when necessary                    | No urinary problems | One tube or drain inserted            | Sleeping pill     | Less than 65 years old |
| 5            | Walks alone but unstable     | No cognitive impairment and calls nurses when necessary                       | No urinary problems | Multiple tubes and/or drains inserted | Anti-hypertensive | 80 years old and over  |
| 6            | Needs assistance in transfer | No cognitive impairment and calls nurses when necessary                       | Frequency           | One tube or drain inserted            | Anti-hypertensive | Less than 65 years old |
| 7            | Walk alone but unstable      | Impaired cognition and does not call nurses when necessary                    | Nocturia            | No tube or drain inserted             | Antibiotic        | 80 years old and over  |
| 8            | Needs assistance in transfer | Impaired cognition and does not call nurses when necessary                    | Frequency           | Multiple tubes and/or drains inserted | Sleeping pill     | 80 years old and over  |
| 9            | Independent                  | No cognitive impairment, but reserved and does not call nurses                | Frequency           | No tube or drain inserted             | Anti-hypertensive | 80 years old and over  |

|    |                              |                                                                               |                     |                                       |                   |                        |
|----|------------------------------|-------------------------------------------------------------------------------|---------------------|---------------------------------------|-------------------|------------------------|
|    |                              | when necessary                                                                |                     |                                       |                   |                        |
| 10 | Walks alone but unstable     | No cognitive impairment, but reserved and does not call nurses when necessary | Frequency           | Multiple tubes and/or drains inserted | Antibiotic        | Less than 65 years old |
| 11 | Walks alone but unstable     | No cognitive impairment and calls nurses when necessary                       | Frequency           | No tube or drain inserted             | Sleeping pill     | 65-79 years old        |
| 12 | Needs assistance in transfer | No cognitive impairment and calls nurses when necessary                       | Nocturia            | Multiple tubes and/or drains inserted | Antibiotic        | 65-79 years old        |
| 13 | Independent                  | No cognitive impairment, but reserved and does not call nurses when necessary | No urinary problems | Multiple tubes and/or drains inserted | Sleeping pill     | 65-79 years old        |
| 14 | Independent                  | Impaired cognition and does not call nurses when necessary                    | Frequency           | One tube or drain inserted            | Antibiotic        | 65-79 years old        |
| 15 | Needs assistance in transfer | No cognitive impairment, but reserved and does not call nurses when necessary | No urinary problems | One tube or drain inserted            | Antibiotic        | 80 years old and over  |
| 16 | Needs assistance in transfer | Impaired cognition and does not call nurses when necessary                    | No urinary problems | No tube or drain inserted             | Anti-hypertensive | 65-79 years old        |
| 17 | Needs assistance in transfer | No cognitive impairment and calls nurses when necessary                       | No urinary problems | No tube or drain inserted             | Antibiotic        | Less than 65 years old |
| 18 | Needs assistance in transfer | Impaired cognition and does not call nurses when necessary                    | Nocturia            | Multiple tubes and/or drains inserted | Anti-hypertensive | Less than 65 years old |

Supplementary Table 2. Factor analysis of the cognitive scales and reliability coefficients

| Variables                                   | Factor 1 | Factor 2         | Factor 3         |
|---------------------------------------------|----------|------------------|------------------|
| BN item1                                    | 0.665    |                  |                  |
| BN item2                                    | 0.740    |                  |                  |
| BN item3                                    | 0.593    |                  |                  |
| AB item1                                    |          | 0.670            |                  |
| AB item2                                    |          | 0.659            |                  |
| AB item3                                    |          | 0.622            |                  |
| BB item1                                    |          |                  | 0.651            |
| BB item2                                    |          |                  | 0.697            |
| BB item3                                    |          |                  | 0.436            |
| Eigenvalue                                  | 2.169    | 2.030            | 1.587            |
| Variance explained<br>(Cumulative variance) | 0.241    | 0.226<br>(0.467) | 0.176<br>(0.643) |
| KR 20 coefficients                          | 0.323    | 0.562            | 0.434            |

Note: BN: Base-rate neglect, AB: Availability bias, BB: Belief bias

Bartlett's test of sphericity: Chi-squared (36) = 804.64,  $p < .001$ , The Kaiser, Meyer, Olkin (KMO) = 0.59.

Supplementary Table 3. Frequency of the responses in cognitive bias

| Total score | Base-rate neglect | Belief bias  | Availability bias |
|-------------|-------------------|--------------|-------------------|
| 0           | 4 (1.19%)         | 28 (8.36%)   | 98 (29.25%)       |
| 1           | 16 (4.78%)        | 68 (20.30%)  | 93 (27.76%)       |
| 2           | 83 (24.78%)       | 113 (33.73%) | 88 (26.27%)       |
| 3           | 230 (68.66%)      | 119 (35.52%) | 54 (16.12%)       |
| Missing     | 2 (0.60%)         | 7 (2.09%)    | 2 (0.60%)         |
| Mean (SD)   | 2.62 (0.64)       | 1.99 (0.95)  | 1.29 (1.06)       |

Note: Means and the standard deviations were calculated after replacing missing values with the median values.

Supplementary Table 4. Spearman correlation coefficients between variables

|                     | Experience | Age     | Education | Sex     | Base-rate neglect | Belief bias | Availability bias |
|---------------------|------------|---------|-----------|---------|-------------------|-------------|-------------------|
| Age                 | 0.921*     |         |           |         |                   |             |                   |
| Education           | -0.291*    | -0.271* |           |         |                   |             |                   |
| Sex                 | -0.004     | 0.028   | 0.073     |         |                   |             |                   |
| Base-rate neglect   | -0.042     | -0.074  | -0.142*   | -0.090  |                   |             |                   |
| Belief bias         | 0.100      | 0.061   | -0.060    | 0.025   | 0.056             |             |                   |
| Availability bias   | 0.098      | 0.113*  | 0.025     | 0.105   | -0.050            | 0.072       |                   |
| Ns Judgement (Mean) | -0.052     | -0.079  | -0.138*   | -0.150* | 0.099             | -0.029      | -0.166*           |

Note: \*  $p < 0.05$ . Missing values were replaced with the median values in the continuous/ordinal variables, and the most representative category in the nominal variables.

The dummy variables are as follows: Education (0: Diploma, 1: Degree), Sex (0: Women, 1: Men). The scores of the bias scales ranged from 0 to 3.
